# Supplementary material for: N-Heterocyclic carbene-stabilized gold–copper nanoclusters: synthesis, bonding and mechanochromism
Source: Royal Society of Chemistry journal article supplement (doi:10.1039/d4nr03320e), 2024-01-01
Supplement: d4nr03320e1.pdf [file d4nr03320e1.pdf]

## **N-Heterocyclic Carbene-Stabilized Gold-Copper Nanoclusters: Synthesis, Bonding and Mechanochromism**

Dongjie Zuo<sup>a</sup>, Huifang Guo<sup>a</sup>, Qinghua Xu<sup>a</sup>, Ayisha He<sup>a</sup>, Zilin Li<sup>a</sup>, Simin Li<sup>\*a</sup>, Hui Shen<sup>\*a</sup>

<sup>a</sup> College of Energy Materials and Chemistry, Inner Mongolia University, Hohhot 010021, China

E-mail: shen@imu.edu.cn

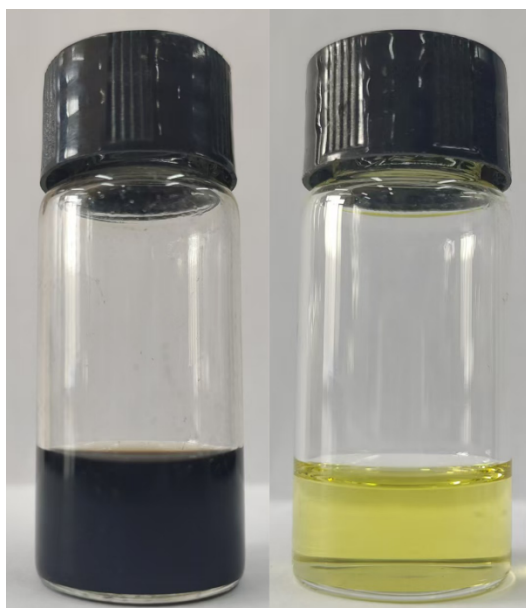

**Figure S1.** Digital photographs showing raw product in the presence (left) and absence (right) of the Cu salt in the cluster synthesis.

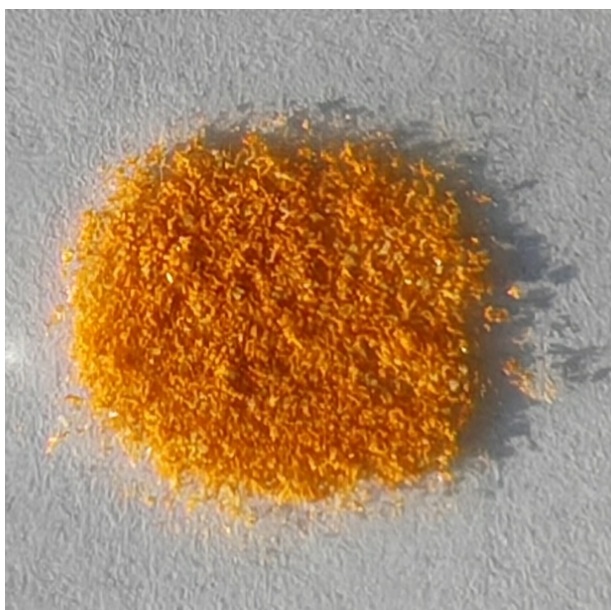

**Figure S2.** Digital photograph of Au<sub>3</sub>Cu crystals.

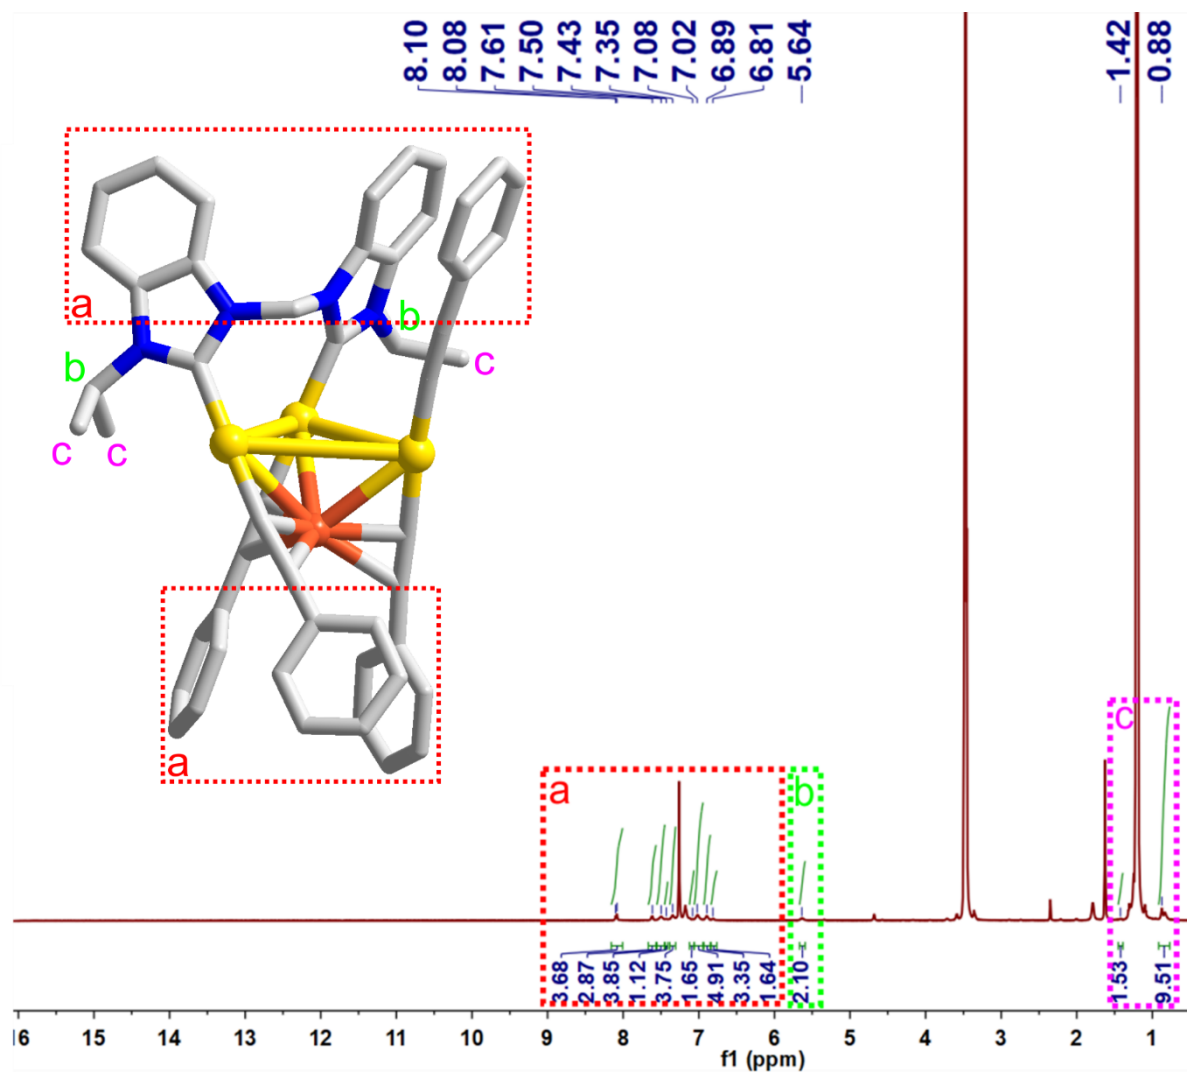

**Figure S3.**  $^1\text{H}$  NMR spectra (600 MHz, 298 K) of  $\text{Au}_3\text{Cu}$  in  $\text{CDCl}_3$ .

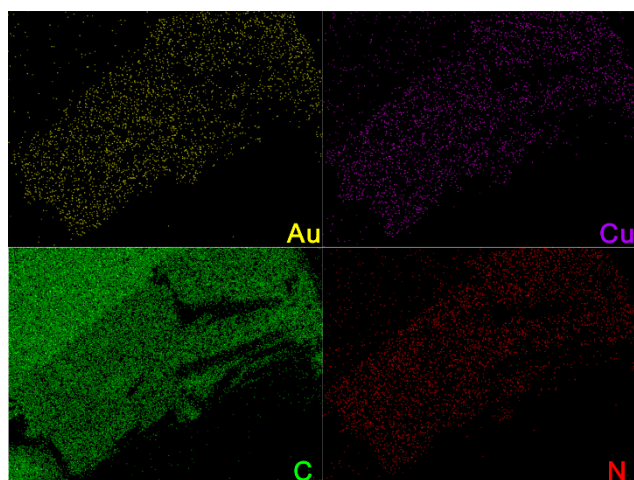

**Figure S4.** EDS image of the Au<sub>3</sub>Cu nanocluster.

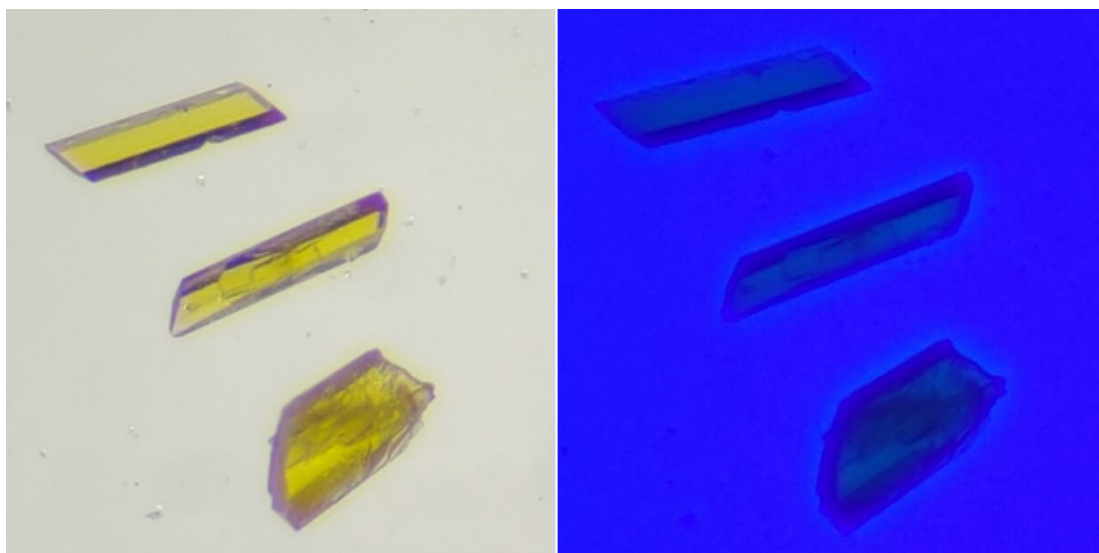

**Ambient light**

**UV light**

**Figure S5.** Luminescent phenomena of Au<sub>3</sub>Cu clusters under ambient and UV light.

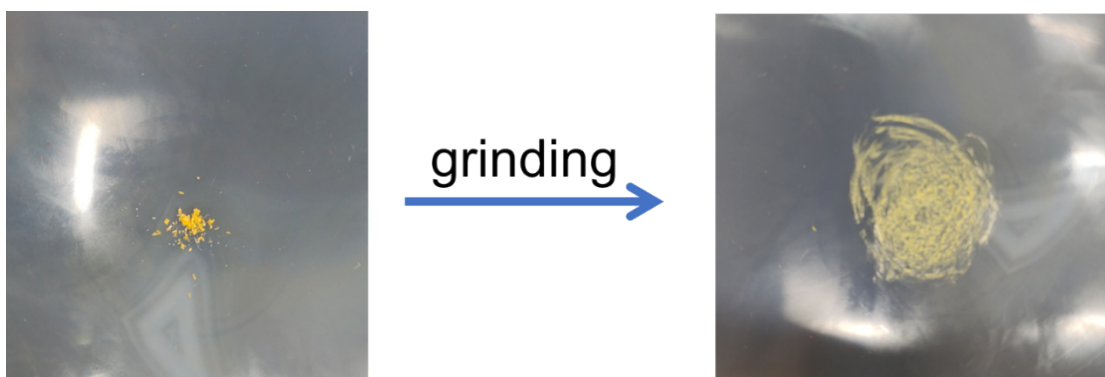

**Figure S6.** Digital photographs showing the grinding process of the  $\text{Au}_3\text{Cu}$  cluster under ambient light.

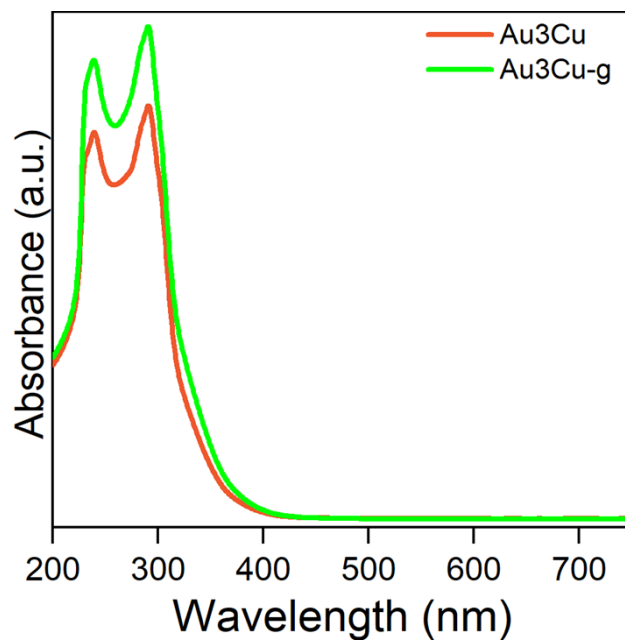

**Figure S7.** The UV-Vis spectrum of Au<sub>3</sub>Cu before and after grinding.



**Table S1.** Crystallographic data of Au<sub>3</sub>Cu(iPrNHCiPr)(PA)<sub>4</sub>.

| Identification code                        | Au <sub>3</sub> Cu(iPrNHCiPr)(PA) <sub>4</sub>                                     |
|--------------------------------------------|------------------------------------------------------------------------------------|
| <b>Formula</b>                             | C <sub>53</sub> H <sub>44</sub> Au <sub>3.1</sub> Cu <sub>0.9</sub> N <sub>4</sub> |
| <b>Formula wight</b>                       | 1404.70                                                                            |
| <b>Temperature/K</b>                       | 100.00(10)                                                                         |
| <b>Crystal system</b>                      | monoclinic                                                                         |
| <b>Space group</b>                         | P21/c                                                                              |
| <b>a (Å)</b>                               | 11.30910(10)                                                                       |
| <b>b (Å)</b>                               | 15.7826(2)                                                                         |
| <b>c (Å)</b>                               | 25.6534(2)                                                                         |
| <b>α (°)</b>                               | 90                                                                                 |
| <b>β (°)</b>                               | 100.2160(10)                                                                       |
| <b>γ (°)</b>                               | 90                                                                                 |
| <b>V (Å<sup>3</sup>)</b>                   | 4506.21(8)                                                                         |
| <b>Z</b>                                   | 4                                                                                  |
| <b>D<sub>c</sub> / (g·cm<sup>-3</sup>)</b> | 2.071                                                                              |
| <b>Radiation</b>                           | Cu Kα (λ= 1.54184 Å)                                                               |
| <b>Theta (°) range</b>                     | 6.604 to 150.066                                                                   |
| <b>Index ranges</b>                        | -14 ≤ h ≤ 7, -16 ≤ k ≤ 19, -32 ≤ l ≤ 31                                            |
| <b>Refls. Total</b>                        | 29993                                                                              |
| <b>Restraints</b>                          | 48                                                                                 |
| <b>Parameters</b>                          | 554                                                                                |
| <b>R<sub>int</sub></b>                     | 0.0371                                                                             |
| <b>R<sub>1</sub>/wR<sub>2</sub></b>        | 0.0329                                                                             |
| <b>[I&gt;2σ(I)]</b>                        | 0.0830                                                                             |
| <b>R<sub>1</sub>/wR<sub>2</sub></b>        | 0.0377                                                                             |
| <b>(all data)</b>                          | 0.0853                                                                             |
| <b>Completeness</b>                        | 0.998                                                                              |
| <b>Goof</b>                                | 1.036                                                                              |

**Table S2.** Selected bond lengths (Å) of Au<sub>3</sub>Cu.

| <i>Parameter</i> | <i>Value (Å)</i> | <i>Parameter</i> | <i>Value (Å)</i> |
|------------------|------------------|------------------|------------------|
| Au01-Cu04        | 2.9595(9)        | Au04-C012        | 2.436(6)         |
| Au02-Au04        | 2.8737(9)        | Au04-C018        | 2.352(7)         |
| Au02-C00G        | 2.002(6)         | C00F-Cu04        | 2.119(6)         |
| Au02-C00H        | 2.023(6)         | C00G-Cu04        | 2.149(6)         |
| Au03-Cu04        | 2.8968(9)        | C00K-Cu04        | 2.254(6)         |
| Au04-C00F        | 2.119(6)         | C00R-Cu04        | 2.091(6)         |
| Au04-C00G        | 2.149(6)         | C012-Cu04        | 2.436(6)         |
| Au04-C00K        | 2.254(6)         | C018-Cu04        | 2.352(7)         |
| Au04-C00R        | 2.091(6)         |                  |                  |
